# Supplementary material for: Single-cell transcriptomics of a dynamic cell behavior in murine airways
Source: eLife journal article supplement (doi:10.7554/elife.76645), 2023-04-21
Supplement: supp [file elife-76645-supp-v1.zip]

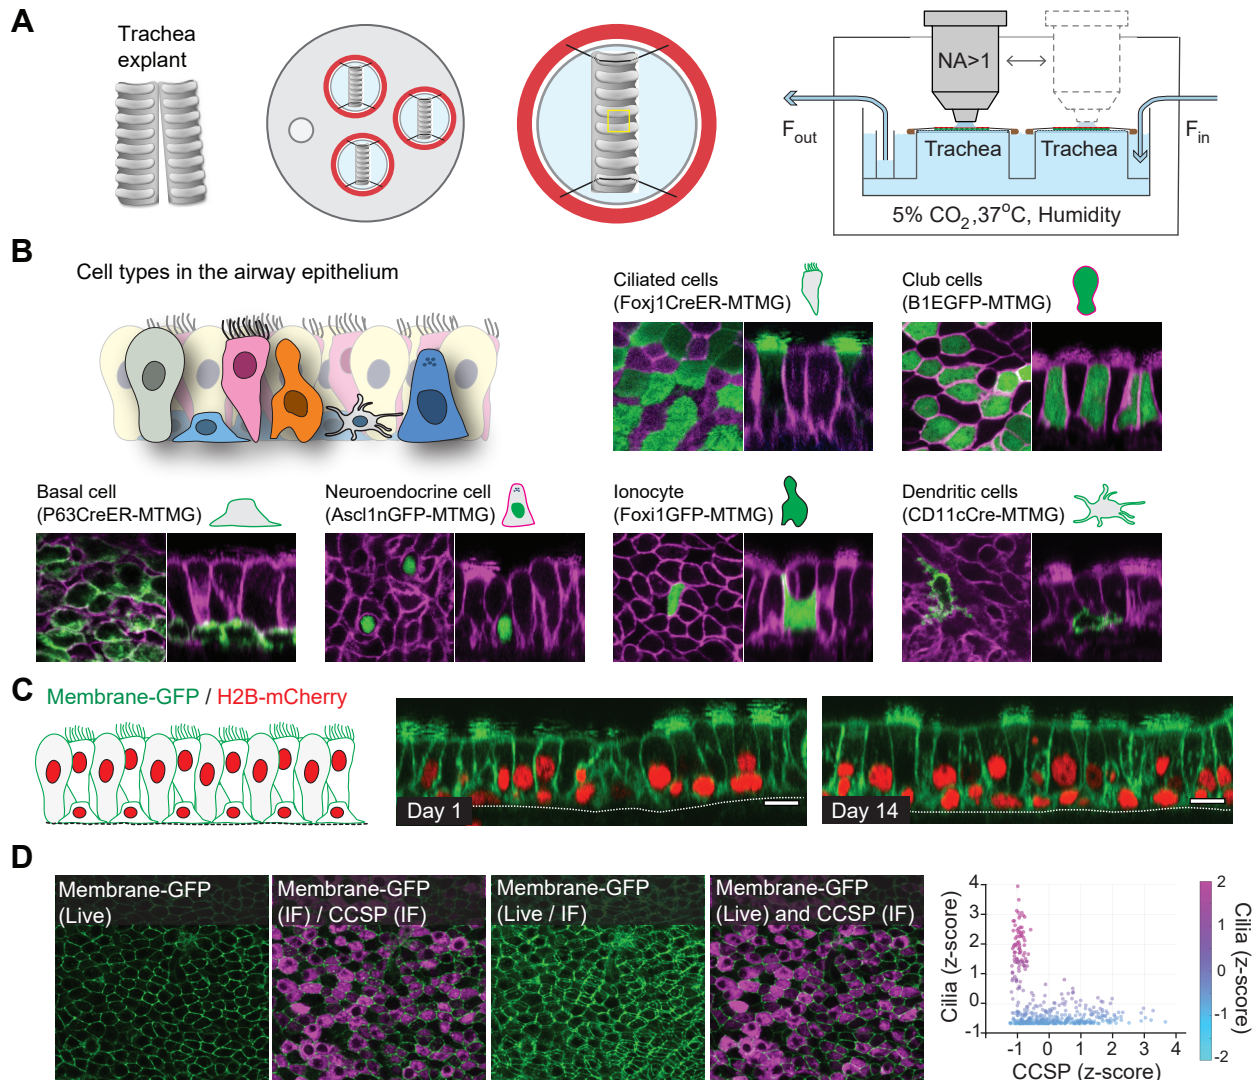

**Figure 1 – figure supplement 1. Platform for live imaging of airway tissue.** (A) Detailed schematic of ALI platform for airway tissue imaging. The platform enables imaging of multiple tissue explants at a time in a controlled environment maintaining ALI, temperature, humidity, and CO<sub>2</sub> content. (B) Representative images of airway epithelial cells using different transgenic mouse models including fluorescent reporters for ciliated, club, basal, neuroendocrine, ionocyte, and dendritic cells. Green = cell type-specific GFP reporter; magenta = membrane-tdTomato. Scale bar = 10  $\mu$ m. (C) Representative two-photon images of the same airway tissue explanted from a membrane-GFP/H2B-mCherry transgenic mouse at day 1 and day 14 in ALI culture. Scale bar = 10  $\mu$ m. (D) Registration of live imaging with post-fixation-staining imaging using in silico tissue flattening followed by non-rigid 3D registration. Ciliated cells identified by live imaging were found to have low CCSP expression, while cells with high CCSP expression tended to have no cilia.
