# Supplementary material for: Single-cell transcriptomics of a dynamic cell behavior in murine airways
Source: eLife journal article supplement (doi:10.7554/elife.76645), 2023-04-21
Supplement: supp [file elife-76645-supp-v1.zip]

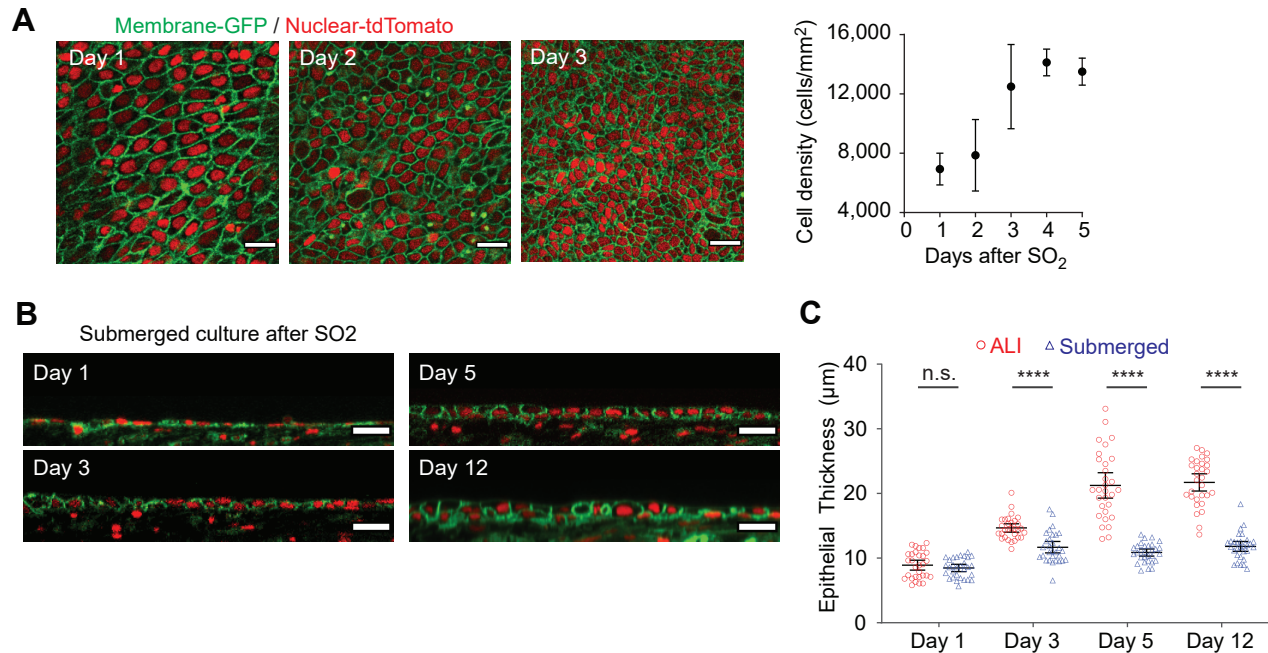

**Figure 2 – figure supplement 1. Epithelial regeneration after sulfur dioxide injury *ex vivo*.** (A) Quantification of cell density measured post SO<sub>2</sub> injury using membrane-GFP/nuclear-tdTomato mice. Scale bar = 20 µm. n=5, error bars indicate the standard deviation. (B) Long - term imaging of tissue regeneration post SO<sub>2</sub> injury in a submerged culture condition. (C) Comparison of tissue regeneration between ALI and submerged culture. Compared to submerged culture, ALI culture enables regeneration of the full epithelial thickness. Green = membrane-GFP; red = nuclear tdTomato. Error bars indicate the 95% confidence intervals. \*\*\*\* p< 0.0001.
