# Supplementary material for: Single-cell transcriptomics of a dynamic cell behavior in murine airways
Source: eLife journal article supplement (doi:10.7554/elife.76645), 2023-04-21
Supplement: supp [file elife-76645-supp-v1.zip]

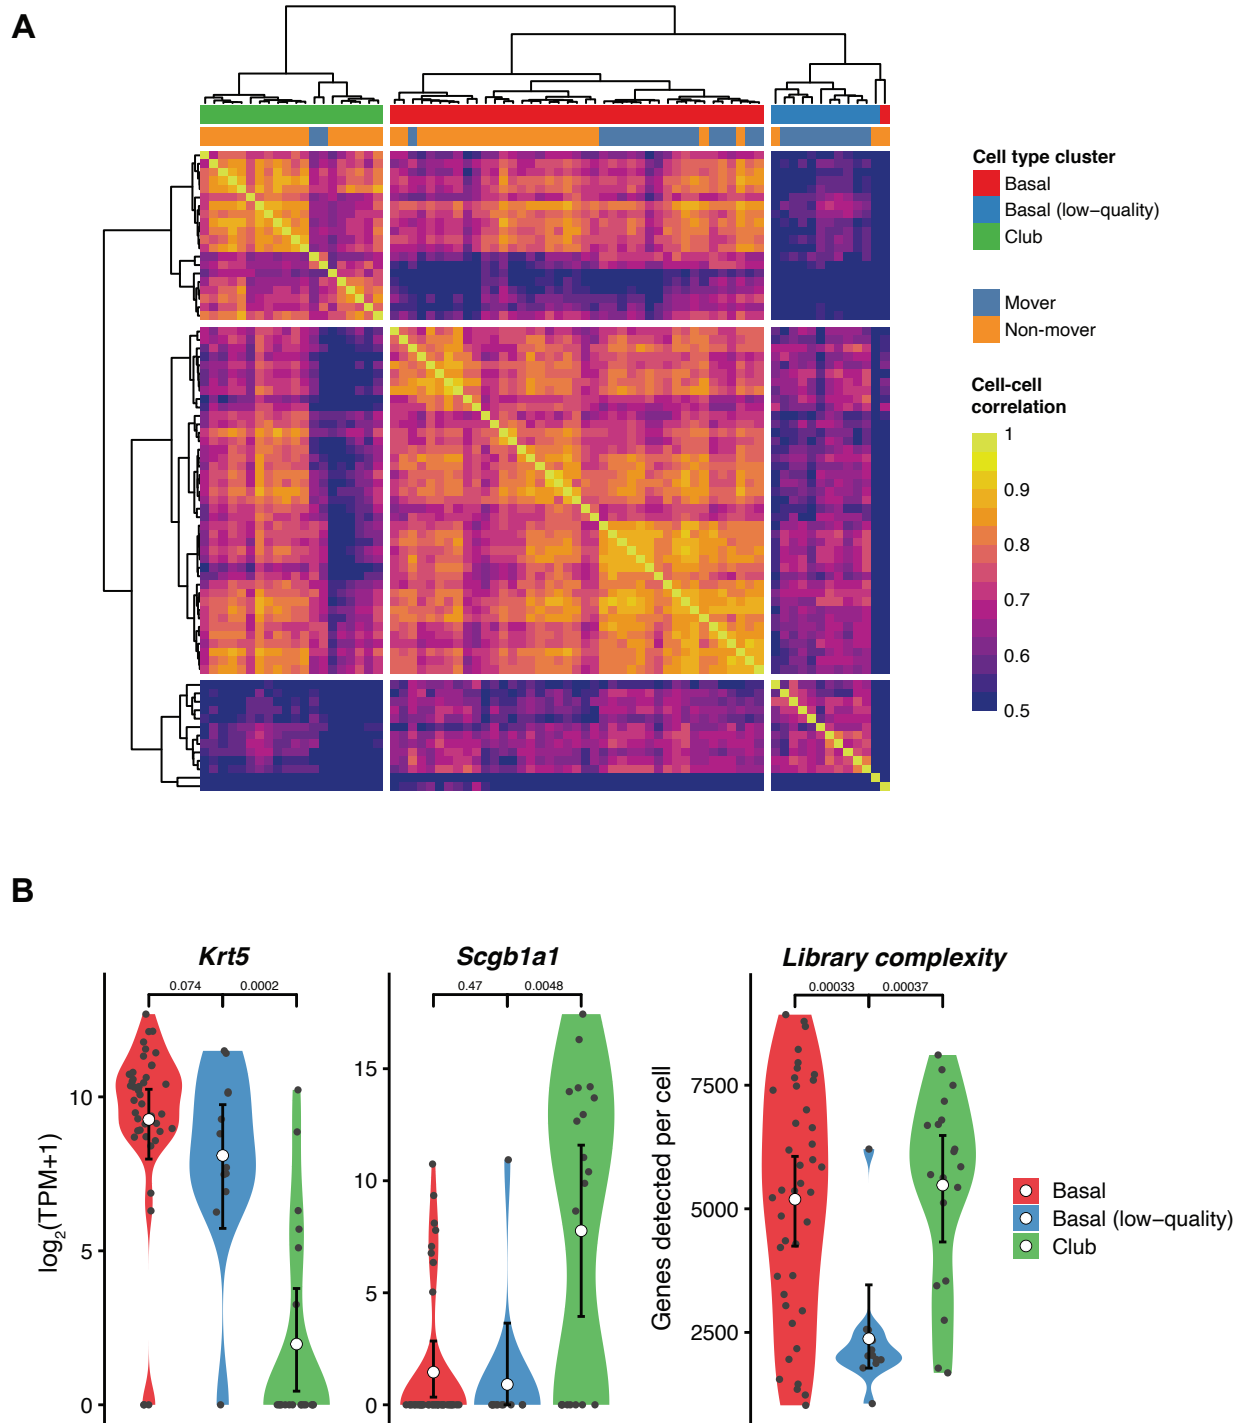

**Figure 3 - figure supplement 1.** Unsupervised clustering of single-cell RNAseq data identifies club and basal cells. **(A).** Heatmap shows cell-cell correlation, Pearson's  $R$  (color bar) between all 74 cells in the dataset. Dendrogram (top) shows the assignment of cells to clusters (color legend). **(B).** Violin plots show the expression of basal cell marker *Krt5* (left), club cell marker *Scgb1a1* (center) and the number of genes detected per cell (right), which were used to interpret the clusters.
