# Supplementary material for: Single-cell transcriptomics of a dynamic cell behavior in murine airways
Source: eLife journal article supplement (doi:10.7554/elife.76645), 2023-04-21
Supplement: supp [file elife-76645-supp-v1.zip]

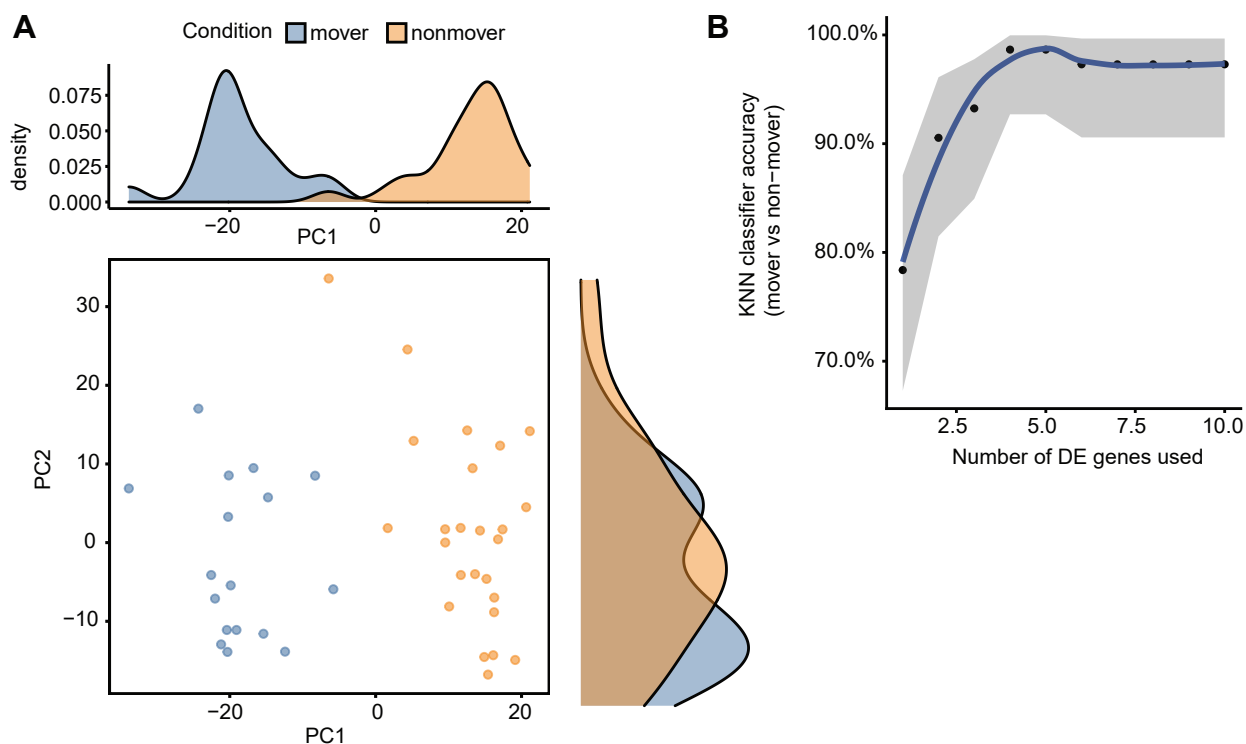

**Figure 3 – figure supplement 2.** Transcriptional programs distinguish M and NM basal cells. **(A)** Principal components analysis (PCA) scatter plot of 42 basal cells (points), showing that the distribution (top and side density histograms) of M and NM basal cells (color legend) is strongly associated with the first principal component. **(B)** Accuracy (y axis) of a machine learning (*k*-nearest neighbor) classifier in distinguishing M from NM basal cells using the top *n* most differentially expressed genes (x axis). The high accuracy indicates that M and NM clusters are well separated in transcriptional space.
