# Supplementary material for: Single-cell transcriptomics of a dynamic cell behavior in murine airways
Source: eLife journal article supplement (doi:10.7554/elife.76645), 2023-04-21
Supplement: supp [file elife-76645-supp-v1.zip]

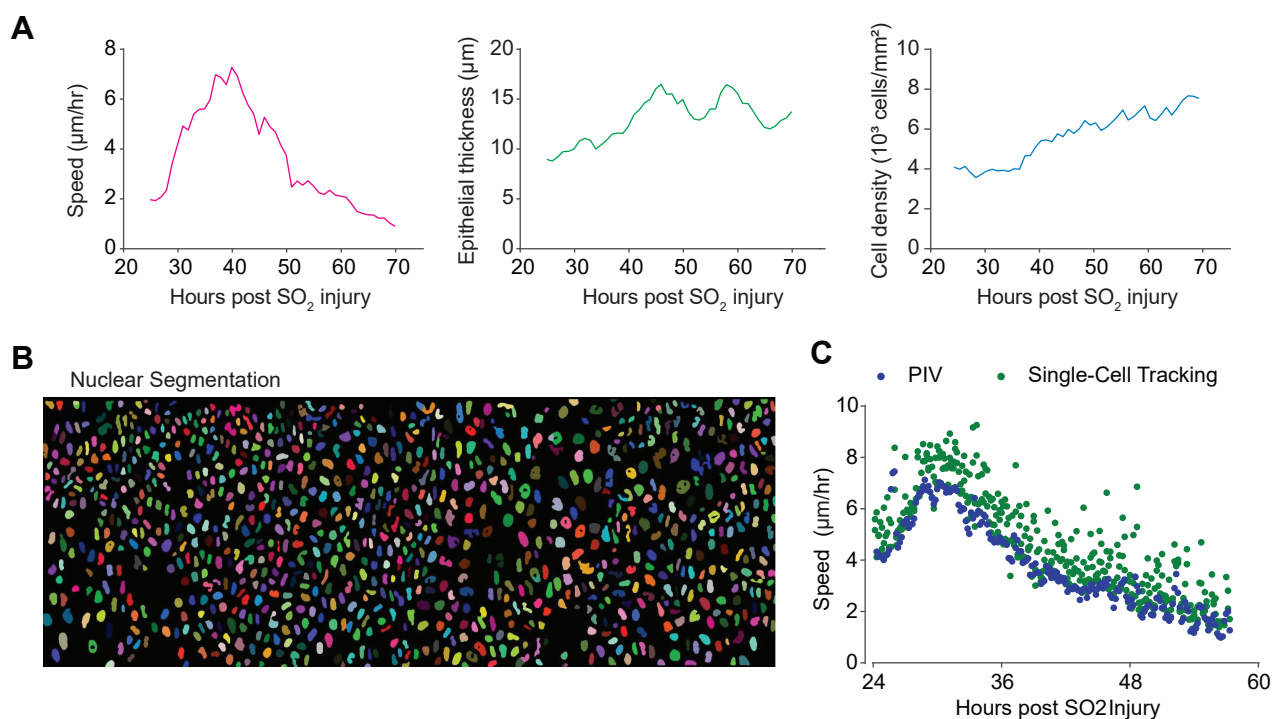

**Figure 2 – figure supplement 2. Live imaging enables quantitative analysis of epithelial cell movement over time.** (A) Quantification of key parameters quantified by time-lapse imaging of the regenerating epithelium, including speed, epithelial thickness, and cell density. (B) Nuclear segmentation of epithelial cells from KRT5rtTA-H2BmCherry transgenic mouse. (C) Speed of moving cells from time-lapse microscopy computed by particle-imaging-velocimetry (PIV) and single-cell tracking of segmented nuclei. There is no significant difference in the computed speed using different methods.
