# Supplementary material for: Single-cell transcriptomics of a dynamic cell behavior in murine airways
Source: eLife journal article supplement (doi:10.7554/elife.76645), 2023-04-21
Supplement: supp [file elife-76645-supp-v1.zip]

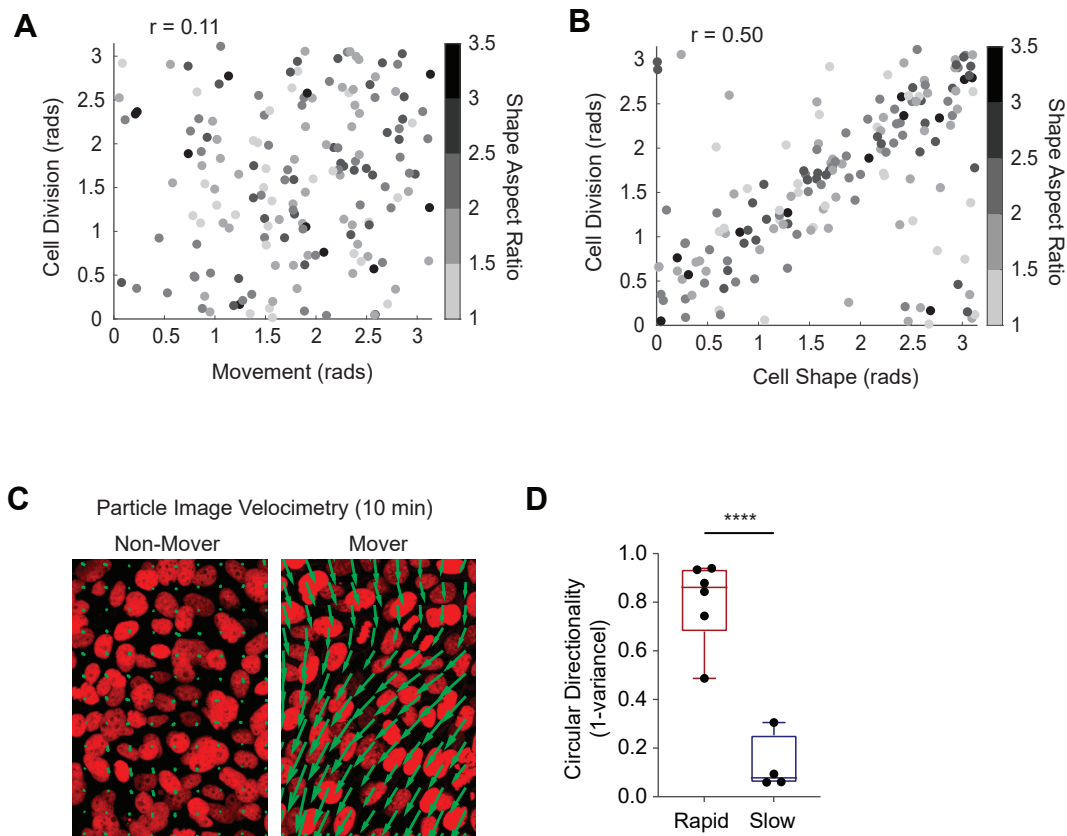

**Figure 2 – figure supplement 3. Live imaging with high temporal resolution.**

(A) Quantification of cell division behaviors during regeneration. The axis of cell division was found to have minimal correlation ( $r=0.11$ ) with local movement, (B) but a moderate correlation with the long axis of the cell ( $r=0.50$ ). (C) Representative movement vectors computed from PIV analysis for a rapid “mover” and a slow “non-mover” region. (D) Cell movement vectors computed from PIV analysis were fit to a von Mises distribution to compute the circular variance. Fast moving cells had a low circular variance (directional), while slow moving cells had a high circular variance (no directional preference). \*\*\*\*  $p<0.0001$ .
